# Supplementary material for: Synergistically reinforced lithium storage performance of in situ chemically grown silicon@silicon oxide core–shell nanowires on three-dimensional conductive graphitic scaffolds
Source: Royal Society of Chemistry journal article supplement (doi:10.1039/c4ta02246g), 2014-06-13
Supplement: c4ta02246g1.pdf [file c4ta02246g1.pdf]

Support Information

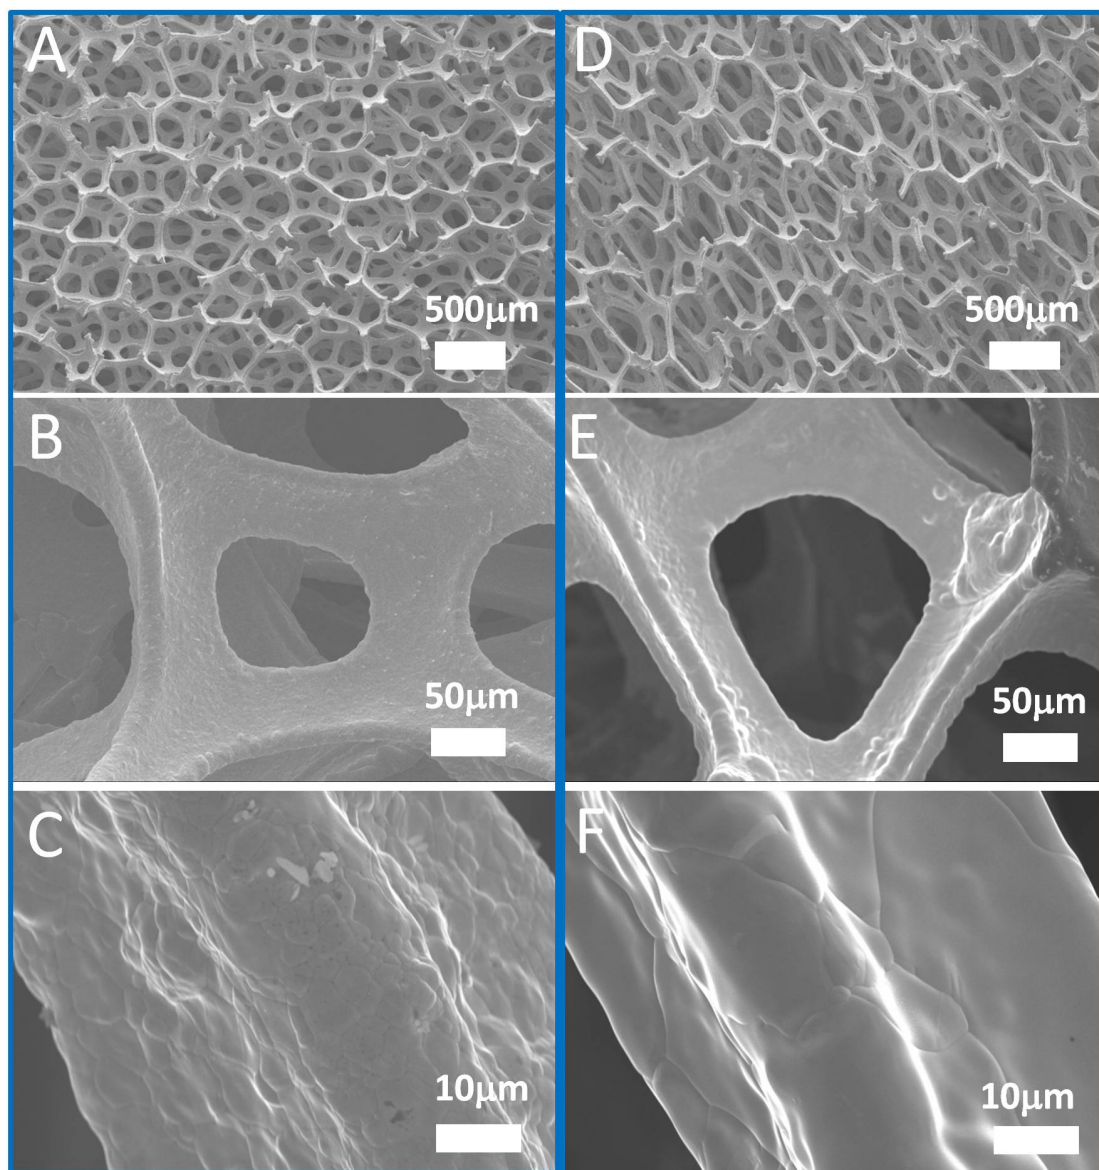

**Fig. S1.** SEM images of Ni foam before (A-C) and after (D-F) graphitic wall deposition.

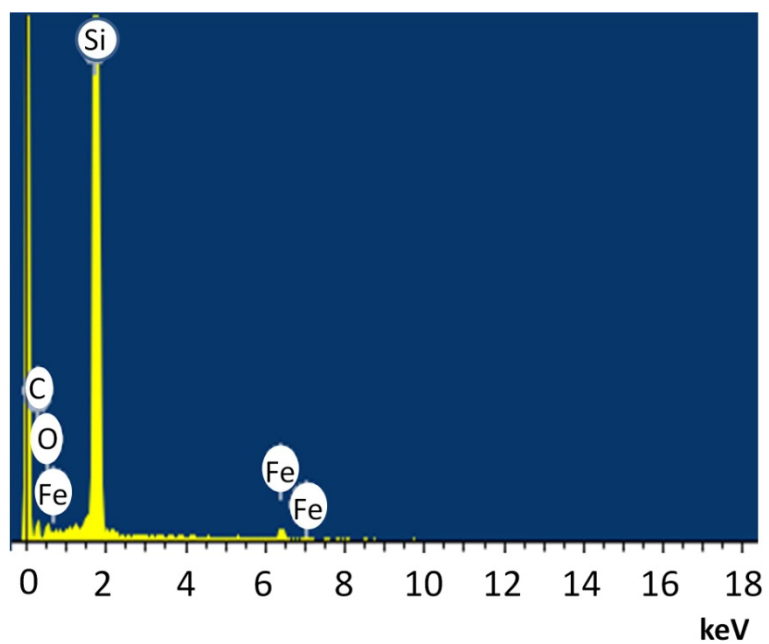

**Fig. S2.** EDX of the Si CNW/3D GF composite.

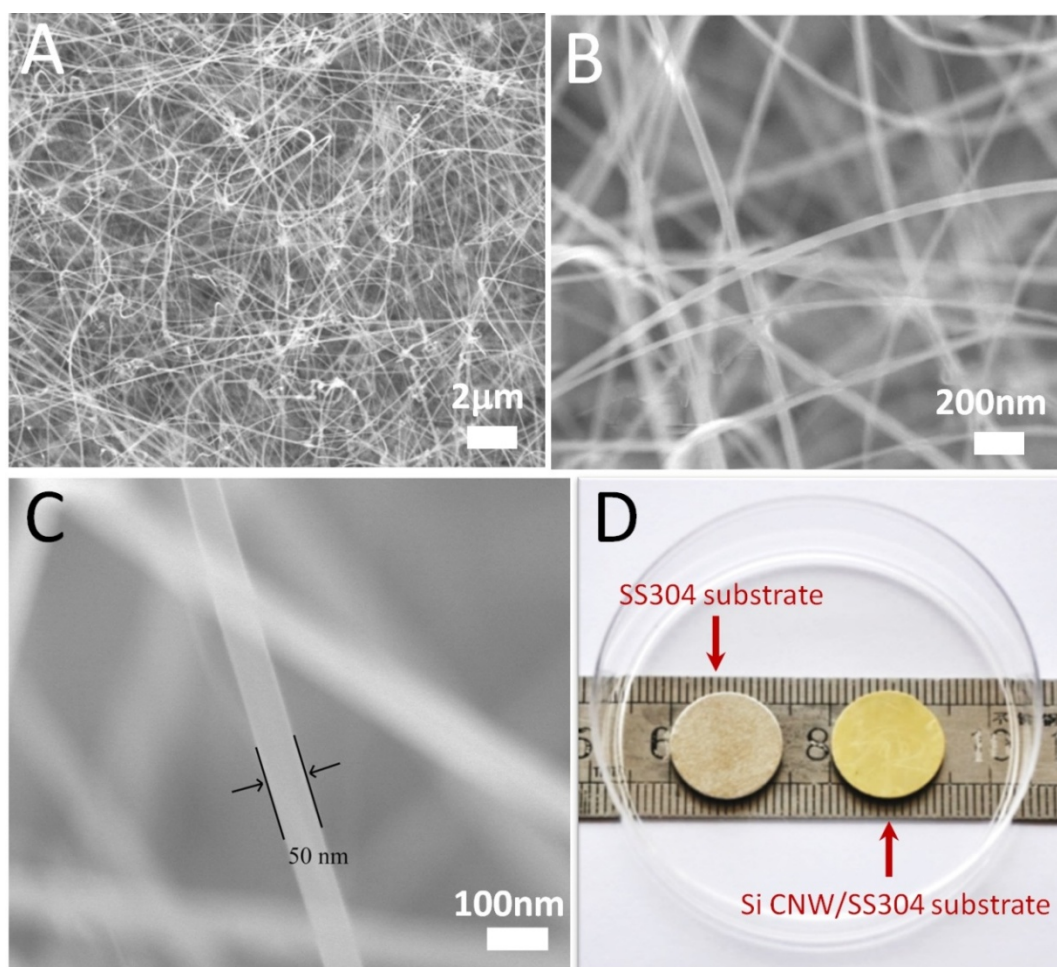

**Fig. S3.** SEM images of the Si CNW arrays on SS304 substrate (A-C) and photograph of real samples of SS304 substrate and Si CNW-grown SS304 substrate.

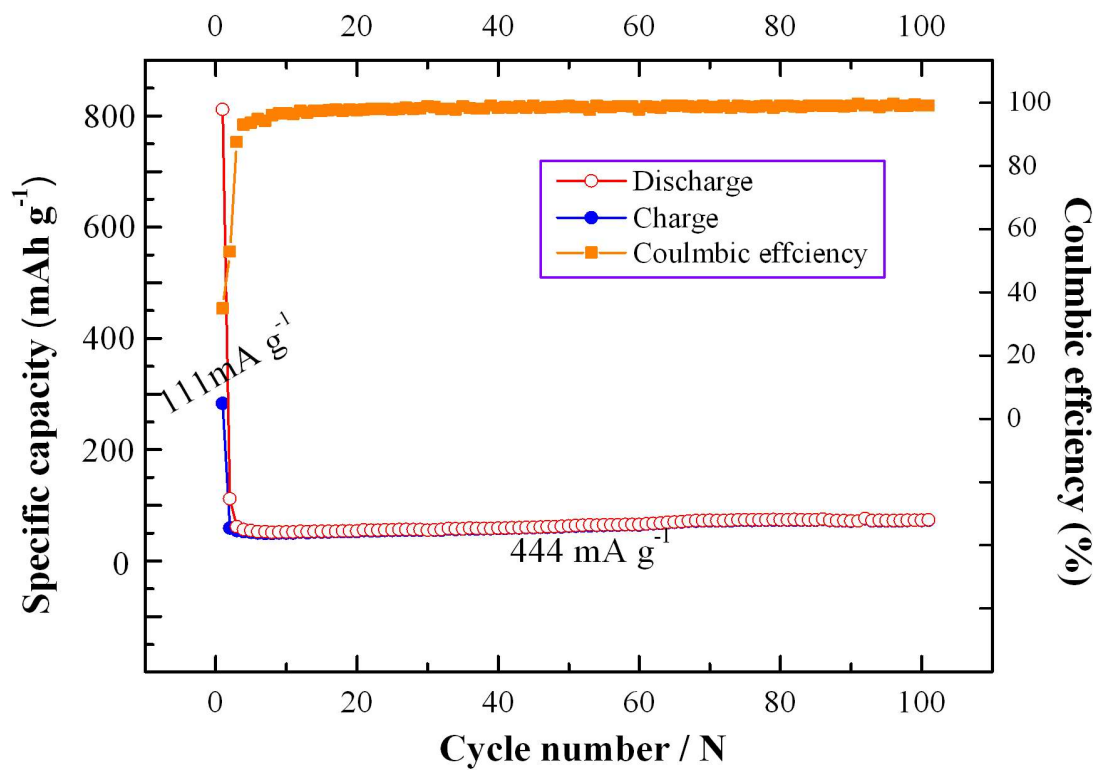

Fig. S4. Cycling performance of the 3D GF electrode based lithium-ion battery.

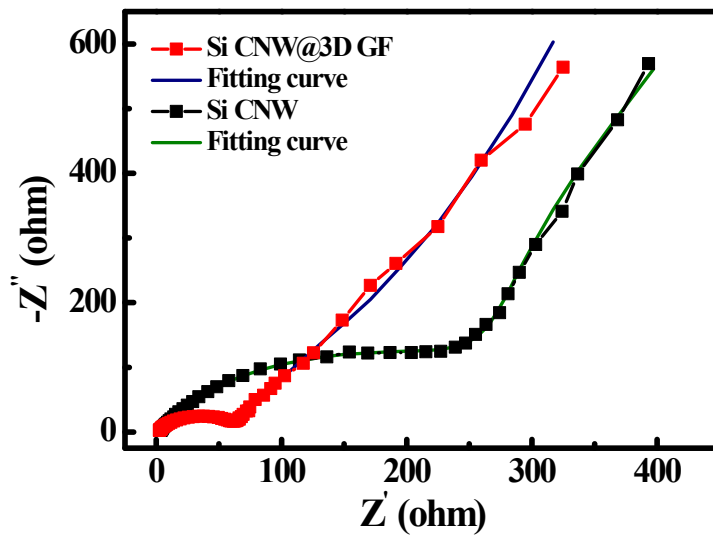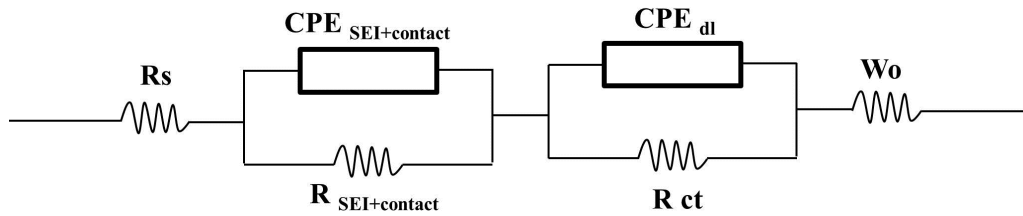

**Fig. S5.** Impedance spectrum (upside) and equivalent circuit (downside) of the Si CNW/3D GF electrode.  $R_s$ : resistance for the electronic conductivity of the electrodes and ionic conductivity of the electrolyte solution, as well as the electronic contact resistances associated with the cell shell, current collectors, and electrode materials;  $CPE_{SEI+contact}$ : constant phase element for SEI film and contact interface between active materials and current collectors;  $R_{SEI+contact}$ : resistance for SEI film and contact interface between active materials and current collectors;  $CPE_{dl}$ : constant phase element (Space double-layer capacitance);  $R_{ct}$ : charge transfer resistance;  $W_o$ : Warburg impedance.

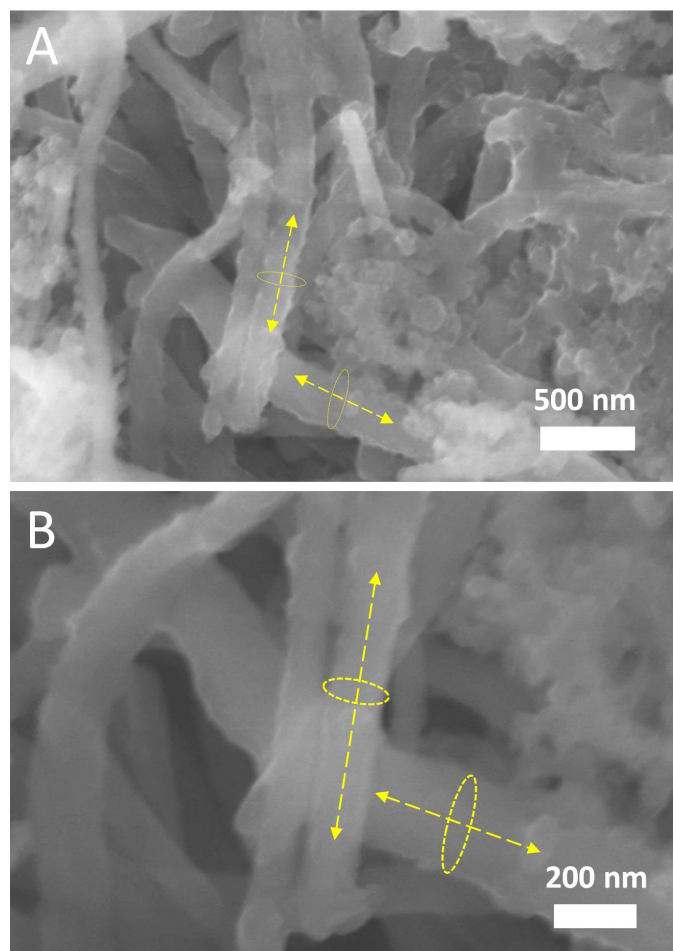

**Fig. S6.** SEM images of the Si CNWs of the composite electrode after 100 cycles. The yellow circles plus arrowed lines indicate the individual Si CNWs.

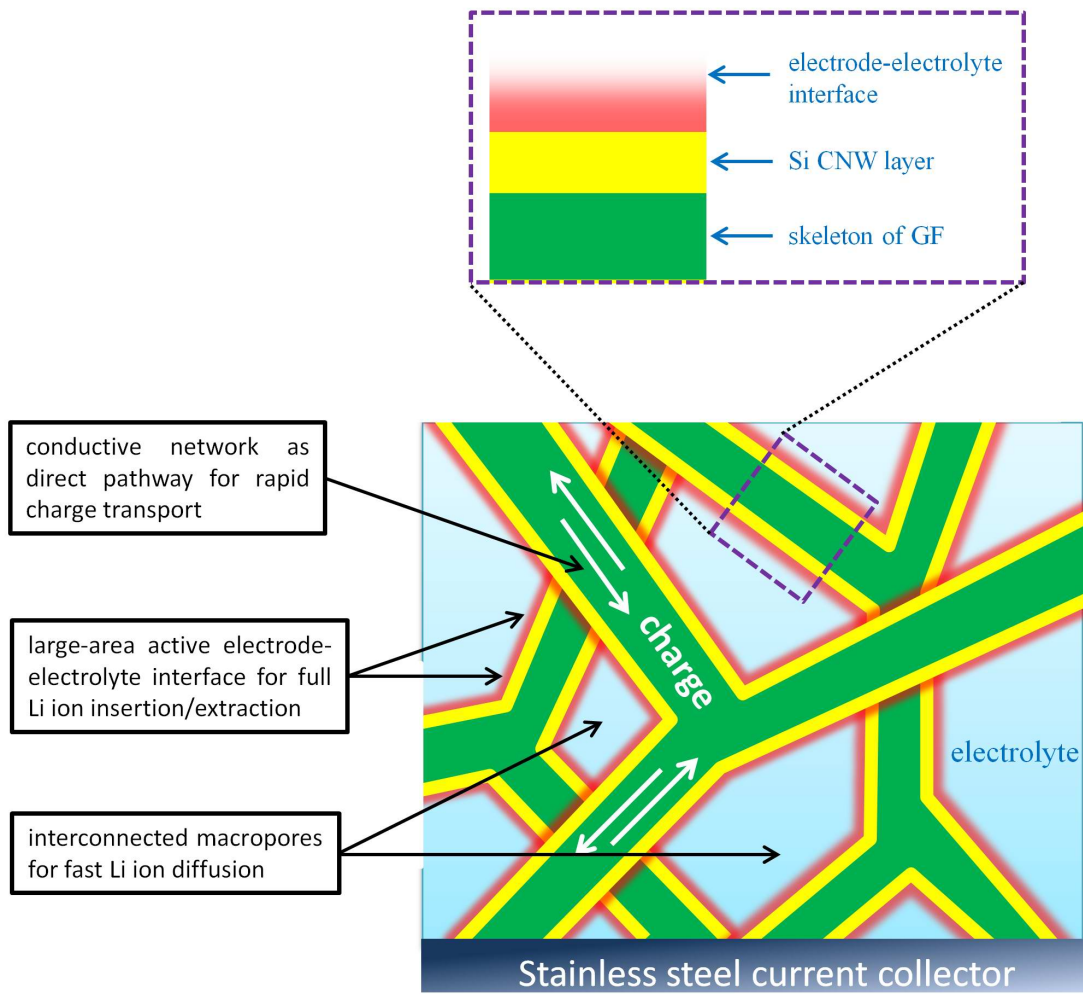

**Fig. S7.** Schematic illustration of possible mechanism for the Si CNM/3D GF based batteries with high performance.

**Tab. S1** Impedance parameters calculated from the equivalent circuit of Figure 5E

|                 | $R_s(\Omega)$ | $CPE_T$   | $CPE_P$ | $R_{ct}(\Omega)$ | $Z_w(R)$ | $Z_w(T)$  | $Z_w(P)$ | $i_0(\text{mA}/\text{cm}^2)$<br>$i_0=RT/nFR_{ct}$<br>t |
|-----------------|---------------|-----------|---------|------------------|----------|-----------|----------|--------------------------------------------------------|
| SiCNW/<br>3D GF | 1.676         | 1.4283e-5 | 0.77906 | 64.77            | 3.592    | 1.3024e-4 | 0.35777  | 0.4                                                    |
| Si CNW          | 2.959         | 1.043e-5  | 0.78789 | 317.3            | 6020     | 0.31859   | 0.87015  | 0.08                                                   |

**Tab. S2** Impedance parameters calculated from the equivalent circuit model including the resistance of SEI and contact

|                  | $R_s(\Omega)$ | $CPE_{SEI+contact}$ |         | $R_{SEI+contact}(\Omega)$ | $CPE_{dl}$ | $R_{ct}(\Omega)$ | $W_o$ |           |         | $i_0(\text{mA}/\text{cm}^2)$<br>$i_0=RT/nFR_{ct}$ |
|------------------|---------------|---------------------|---------|---------------------------|------------|------------------|-------|-----------|---------|---------------------------------------------------|
|                  |               | $CPE_T$             | $CPE_P$ |                           |            |                  | $W_R$ | $W_T$     | $W_P$   |                                                   |
| SiCNW /<br>3D GF | 1.169         | 1.1598e-5           | 0.81963 | 52.83                     | -5.8414e-4 | 127.1            | 30.39 | 4.3253e-3 | 0.42858 | 0.2                                               |
| Si CNW           | 2.908         | 1.0988e-5           | 0.78623 | 292.3                     | 6.669e-5   | 512.4            | 1.421 | 2.0701e-4 | 0.56545 | 0.05                                              |
